# Supplementary material for: A solid-state p–n tandem dye-sensitized solar cell
Source: Royal Society of Chemistry journal article supplement (doi:10.1039/d3se01461d), 2024-01-01
Supplement: d3se01461d1.pdf [file d3se01461d1.pdf]

## Supporting Information for Solid-state p-n tandem dye-sensitized solar cell

*Sina Wrede<sup>1</sup>, Bin Cai<sup>1</sup>, Fangwen Cheng<sup>1</sup>, Malin B. Johansson<sup>1</sup>, Tomas Kubart<sup>2</sup>, Carl Hägglund<sup>3</sup>, Haining Tian<sup>1,\*</sup>*

<sup>1</sup> Department of Chemistry-Ångström Laboratory, Physical Chemistry, Uppsala University, SE-75120 Uppsala, Sweden

<sup>2</sup> Department of Electrical Engineering, Solid-State Electronics, Uppsala University, SE-75120 Uppsala, Sweden

<sup>3</sup> Department of Materials Science and Engineering, Solar Cell Technology, Uppsala University, SE-75120 Uppsala, Sweden

Corresponding Author

\* E-mail: [haining.tian@kemi.uu.se](mailto:haining.tian@kemi.uu.se)

## 1. Device structure during fabrication

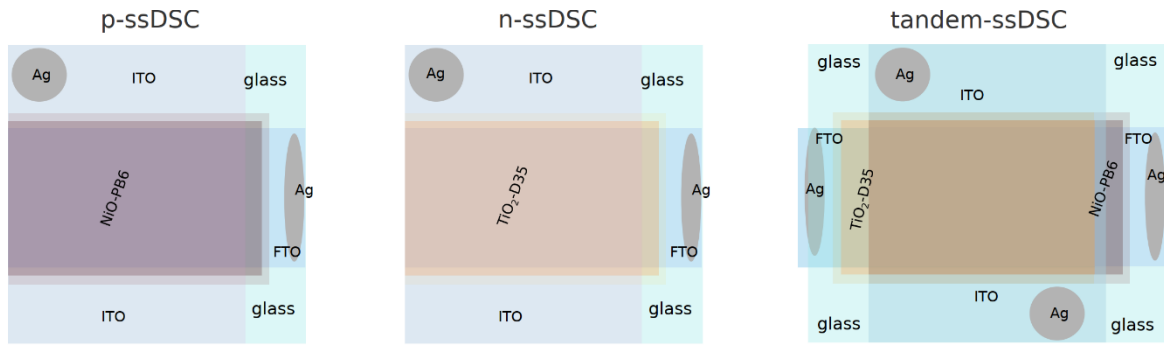

**Figure S1:** Device structure of p-ssDSC, n-ssDSC and resulting tandem device.

## 2. Summary of the field of p-ssDSCs

**Table S1:** Comparative analysis of existing studies of p-ssDSCs

| p-type Semiconductor            | Dye      | ETM            | Counter Electrode | $V_{oc}$ (mV) | $J_{sc}$ ( $\mu\text{A}/\text{cm}^2$ ) | Ref       |
|---------------------------------|----------|----------------|-------------------|---------------|----------------------------------------|-----------|
| NiO from screen printing paste  | P1       | PCBM           | Al                | 620           | 50                                     | 1         |
| NiO from $\text{NiCl}_2$ gel    | PB6      | $\text{TiO}_2$ | Au                | 480           | 23                                     | 2         |
| NiO from screen printing paste  | PB6      | ZnO            | Al                | 440           | 680                                    | 3         |
| NiO from screen printing paste  | TIP      | ZnO            | Al                | 535           | 860                                    | 4         |
| NiO from screen printing paste  | TIP      | $\text{SnO}_2$ | Al                | 269           | 1140                                   | 5         |
| NiO from screen printing paste  | PB6      | $\text{SnO}_2$ | Al                | 199           | 1082                                   | 5         |
| NiO from paste via spin-coating | DPP-PYRO | PCBM           | Al                | 325           | 225                                    | 6         |
| NiO from screen printing paste  | PB6      | ZnO            | ITO               | 407           | 890                                    | This work |

### 3. Extra spin-coating layer is beneficial in addition to aging the cells.

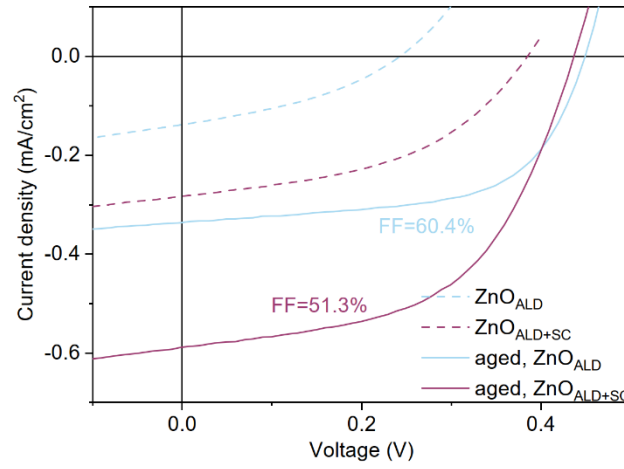

**Figure S2:** *J-V* curves of p-ssDSC with just an ALD layer of ZnO and an extra layer of solution processed ZnO from Zn(acac)<sub>2</sub> solution, both directly after fabrication and after aging for 8 weeks.

#### 4. Thickness optimization of n-ssDSC without or with PB6 cover to match the current of p-ssDSC

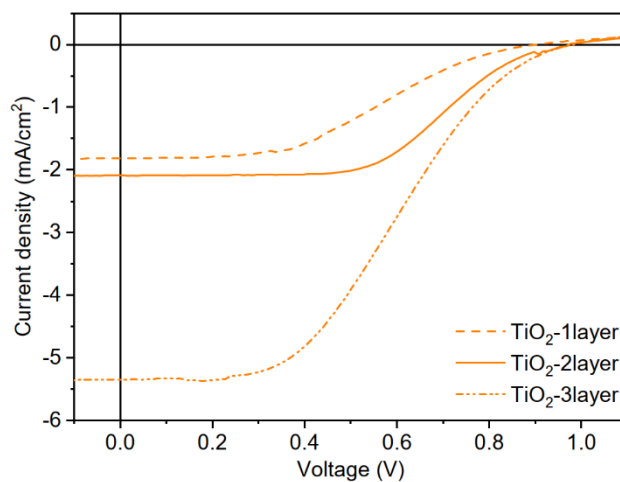

**Figure S3:** *J-V* curves of n-ssDSCs fabricated with 1, 2 and 3 layers of TiO<sub>2</sub>, illuminated from the ITO, without PB6 cover.

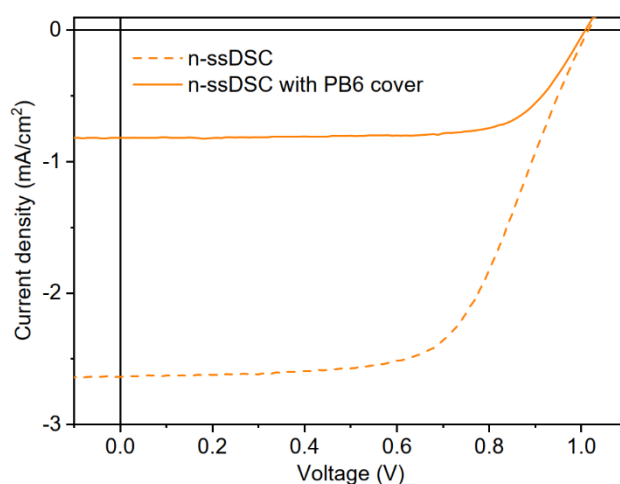

**Figure S4:** *J-V* curves of n-ssDSCs fabricated with 2 layers of TiO<sub>2</sub>, illuminated from the ITO side, with and without PB6 cover.

## 5. SEM of n-ssDSC and p-ssDSC

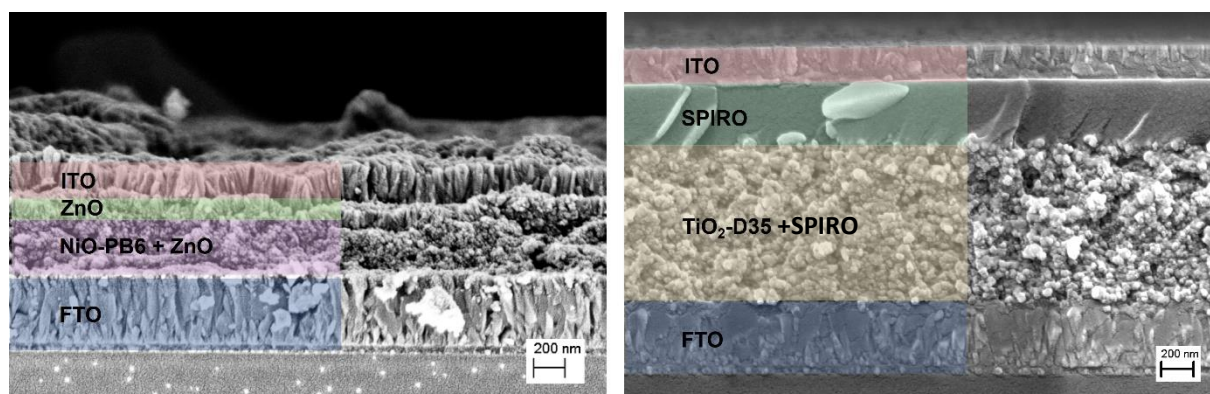

**Figure S5:** SEM cross-section pictures of (left) n-ssDSC and (right) p-ssDSC.

## 6. IPCE of fabricated devices

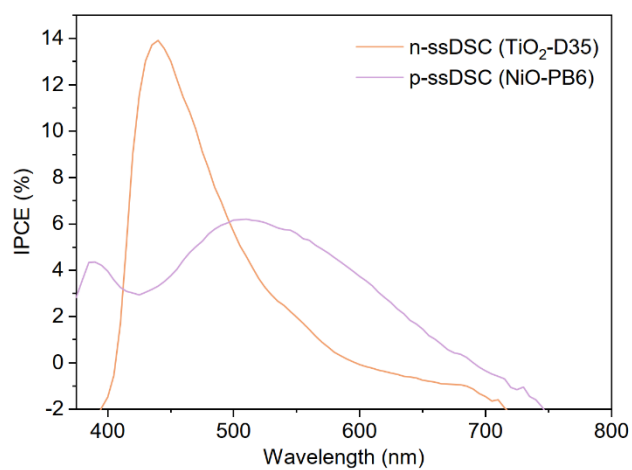

**Figure S6:** Recorded IPCE spectra of p-ssDSC and n-ssDSC.

## 7. Stability of the fabricated solar cells

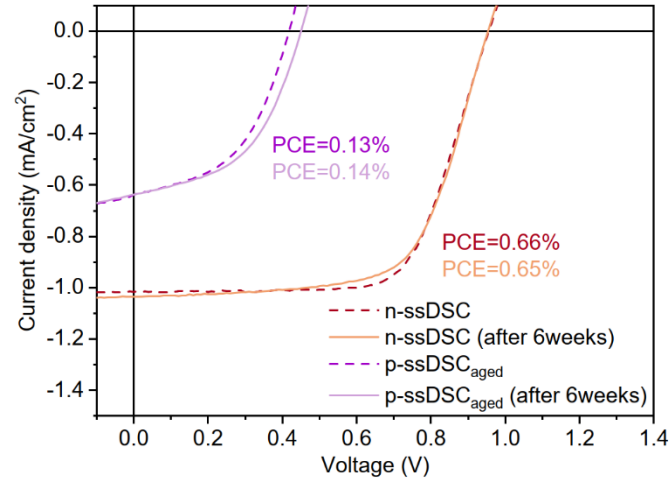

**Figure S7:** *J-V* curves of two ss-DSCs from Fig. 5 in the main text after storage in ambient conditions for 6 weeks. Note that the p-ssDSC is already aged at the starting point and that p-ssDSC is measured by illumination from the FTO side and that the n-ssDSC was shaded by a p-ssDSC during the measurement.

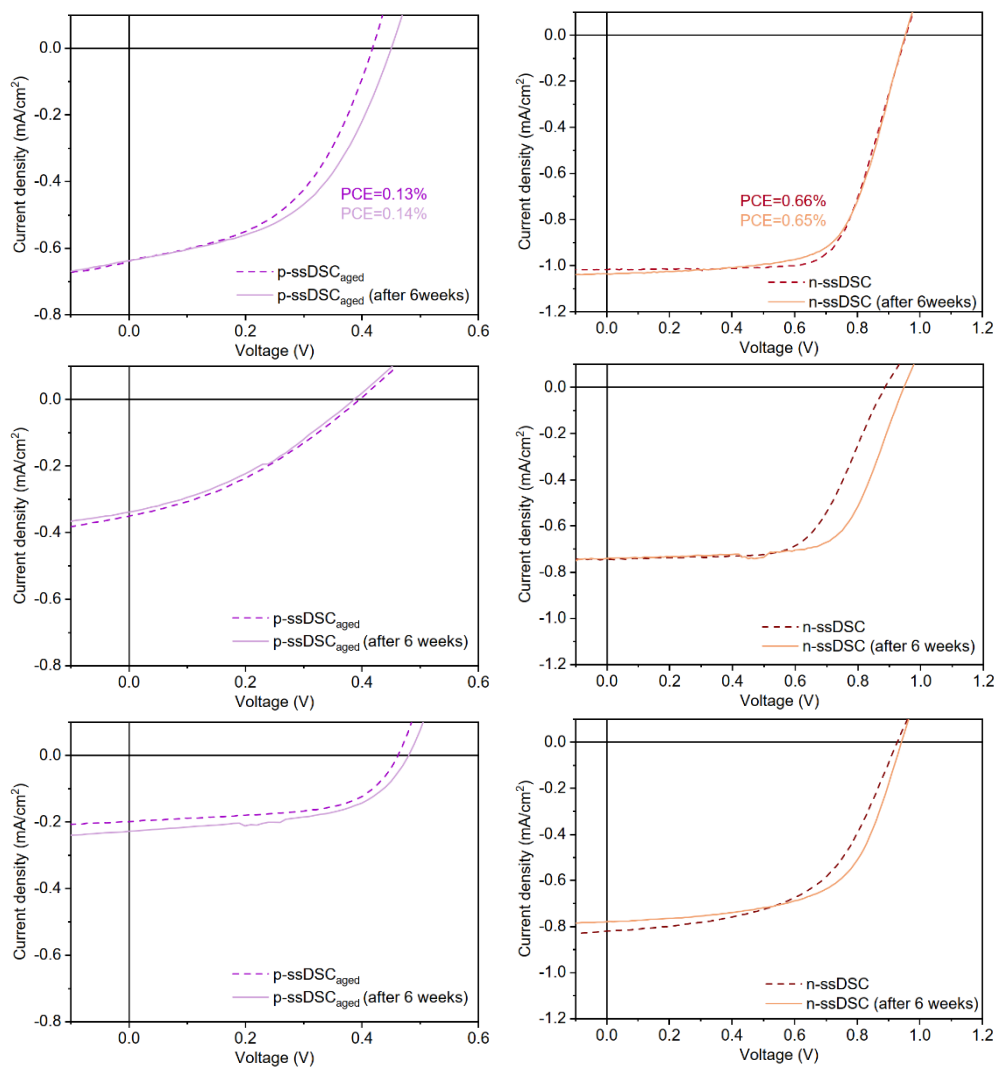

**Figure S8:** J-V curves of three p-ssDSC (left) and p-ssDSC films (right) from Fig. 5 in the main text after storage in ambient conditions for 6 weeks. Note that the p-ssDSC is already aged at the starting point and that p-ssDSC is measured by illumination from the FTO side and that the n-ssDSC was shaded by a p-ssDSC during the measurement.

## References

- (1) Zhang, L.; Boschloo, G.; Hammarström, L.; Tian, H. Solid State P-Type Dye-Sensitized Solar Cells: Concept, Experiment and Mechanism. *Phys. Chem. Chem. Phys.* **2016**, *18* (7), 5080–5085.
- (2) Tian, L.; Föhlinger, J.; Zhang, Z.; Pati, P. B.; Lin, J.; Kubart, T.; Hua, Y.; Sun, J.; Kloo, L.; Boschloo, G.; Hammarström, L.; Tian, H. Solid State P-Type Dye Sensitized NiO–Dye–TiO<sub>2</sub> Core–Shell Solar Cells. *Chem. Commun.* **2018**, *54* (30), 3739–3742.
- (3) Xu, B.; Tian, L.; Etman, A. S.; Sun, J.; Tian, H. Solution-Processed Nanoporous NiO–Dye–ZnO Photocathodes: Toward Efficient and Stable Solid-State p-Type Dye-Sensitized Solar Cells and Dye-Sensitized Photoelectrosynthesis Cells. *Nano Energy* **2019**, *55*, 59–64.
- (4) Xu, B.; Wrede, S.; Curtze, A.; Tian, L.; Pati, P. B.; Kloo, L.; Wu, Y.; Tian, H. An Indacenodithieno[3,2-b]Thiophene-Based Organic Dye for Solid-State p-Type Dye-Sensitized Solar Cells. *ChemSusChem* **2019**, *12* (14), 3243–3248.
- (5) Cheng, H.; Liu, Y.; Cai, B.; Hägglund, C.; Kubart, T.; Boschloo, G.; Tian, H. Atomic Layer Deposition of SnO<sub>2</sub> as an Electron Transport Material for Solid-State P-Type Dye-Sensitized Solar Cells. *ACS Appl. Energy Mater.* **2022**, *5* (10), 12022–12028.
- (6) Pham, T. T. T.; Saha, S. K.; Provost, D.; Farré, Y.; Raissi, M.; Pellegrin, Y.; Blart, E.; Vedraïne, S.; Ratier, B.; Aldakov, D.; Odobel, F.; Bouclé, J. Toward Efficient Solid-State p-Type Dye-Sensitized Solar Cells: The Dye Matters. *J. Phys. Chem. C* **2017**, *121* (1), 129–139.
